# Supplementary material
Source: PubMed Central journal article supplement (PMC7062492)
Supplement: Supplemental_Appendix_Frappe.pdf [file Supplemental_Appendix_Frappe.pdf]

## Supplemental Appendix for:

Frappé P, Cogneau J, Gaboreau Y, et al. Anticoagulants' safety and effectiveness in general practice: a nationwide prospective cohort study. *Ann Fam Med.* 2020;18(3):131-138.

The members of the CACAO Study Group were as follows (n=463, all in France):

Nathan Abenhaïm, Sophie Ackermann, Maryse Adam Blanpain, Xavier Andreu, Céline Arnould, Audrey Atlan-Cottin, Jean-Pierre Aubert, Isabelle Aubin-Auger , Jacques Aubry, Julien Augueux, Veena Augustin, Annick Bakry, Marine Baldesi, Eric Banoun, Eric Barberet, Rémi Bardet, Florence Barriere, Dan Baruch, Nicolas Baude, Marc Bayen, Sabine Bayen, François Bayle, Yannick Beaufiles, Alain Beaupin, Julie Bedel-Chauvaud, Raphaël Bel, Martine Bellier, Farouk Bendamene , Philippe Berard, Cédric Berbé, Christophe Berkhout, Jacques Berland, Charles-Edouard Béthembos, Pierre-Yves Billiard, Olivier Bisch, Aurélie Bizeau, Paul Blanchard, Guy Blanquart, Aurélie Boch, Isabelle Bodein, Emmanuel Boige, Claude Bonin, Anne-Laure Bonis, Marie-Pierre Bonnard, Pascal Bonnet, Pierre-André Bonnet, Gérard Bosselut, Anne Bottet, Philippe Bouche, Bérengère Boucherle, Audrey Bougeard, Serge Bouhana, Mourad Boukeloul, Jean Boulet-Gercourt, Jean-Marie Boulongne, Lionel Bouniol, Jean-Jacques Bourcart, Michel Bourgoïn, Véronique Bourguignon-Vartanian, Claire Bouteville, Philippe Boutin, Annelore Boutmy, Evelyne Brenner-Girault, Nicolas Breton, Muriel Briane-Fraysse , Marina Brodbeck, Olivier Brunet, Ariel Buchinger, Anne Buffaz-Sutra, Marc Bur, Philippe Cabourdin, Philippe Cachera, Eric Cailliez, Matthieu Calafiore, Denis Calvet, Pierre Camedescasse, Hervé Canart, Michel Cancade, Christophe Candelier , Christian Capiod, Thierry Carin, Olivier Caron, Elisa Carré, Yannick Carrillo, Nathalie Casagrande, Pierre Causse, Gaëlle Chabert, Frédérick Chabord, Juliette Chambe, Guillaume Chambon, Richard Champeaux, Laurent Charbonnel, Rodolphe Charles, Clément

Charra, Samuel Chartier, Julie Chastang, Sophia Chatelard, Eric Chatillon, Laurent Chauvot, Hervé Chelle, Stéphane Chenuet, Nicolas Chevalier, David Chevillot, Jean-Pierre Cibeer, Jacques Cittée, Jean-François Claudel, Yvonnick Clemence, Jean-Paul Clerget, Isabelle Clusier-Jeudy, Marie-Pierre Coispeau, Arnaud Colin, Hervé Collart-Dutilleul, Laurence Compagnon, Marine Compan Malet , Laurent Connan, Hubert Conrad, Bruno Coquillaud, Jean-Luc Cormier, Jean-Charles Couette, Yves Cournoyer, Christian Cousin, Stephen Creton, Jean-Jacques Crignon, André Cros, Michel Cunin, Emmanuel Cussac, Jean-Maurice Dailly, Didier Danvin, Pierre-Marie Darnaut, Bruno Daubin , Thomas De L'Hamaide , Yves De Saint Meleuc , Sabine De Taddeo, Jean-Luc Decker, Anne Decobert, Yannick Delattre, Christine Delavenne, Loïc Delavenne, Bénédicte Delbru, Denis Deleplanque, Nicole Delerive, Laurent Delesalle, François Delforge, Jean-Paul Delgrange, Jean-Pierre Delpierre, Eric Demeulemeester , Nicolas Derain, Fabrice Descombe, Thierry Desmoulins, Marie-Claire Deville-Carollo, Jean-Michel Dherbecourt, Michael Didierjean, Salima Domrane, Brigitte Douzou, Sabine Druart, Xavier Dubeau, Arnaud Dubedat, Résika Dudragne, Christian Duez, Lucien Dufour, Sylvie Duhamel, Lionel Duisit, Nathalie Dumoitier, Hervé Dumond, Julien Dumortier, Emilie Duquesne, David Durand, William Durieux, Philippe Durot, Taous Duss, Bénédicte Eschalier, Eric Espiard , Pierre Eterstein, Joël Etienney, Xavier Faidix, Patrice Famery, David Faria, Renaud Faure, André Ferrer, Jean-Marie Ferrer, Jean Feuillet, Christian Fivel, Christian Flaissier , Julien Fortané, Jenny Forté, Claude Fossé, Joël Foucat, Christophe Fouillard, Vianney Fournier, Virginie Fournier, Déborah Fraizy, Paul Frappé, Isabelle Frenoy-Sansarricq, Bernard Gabbai, Yoann Gaboreau, Fabien Gaillard, Isabelle Garnier, Jean-Michel Garnier, Jean-Claude Gascoin, Yves Gault, Martine Gaultier, Bruno Gay , Benoît Gédon, Christophe Genies, Jean-Marc Géniole, Jean-Luc Gentner, Jean-Louis Ghez, Charles Girdi, Christian Girard , Philippe Giraud, Sylvain Godart, Pierre Goidin, Aline Gomez, Céline Goncalves, Arnaud Gouget, Marie-Laure Gouget, Sylvain Gournay, Florence Grand,

Jean-Claude Granier, Roland Greffe, Sabine Grutter, Catherine Gryb, François-Xavier Guedel, Mathieu Guérin, Julien Guiberteau, Jean-François Guille, Jean-Pierre Guillot, Philippe Guillou, Gilles Gustin, Anne Guyot, Jean-Marie Guyot, Christophe Hardy, David Hassid, Latifa Hayani, Anne Heller, Frédéric Henriot, Thierry Hermouet, Bénédicte Hoenner Hecht, Ferreol Honvoh Senadjro, Gaëtan Houdard, Isabelle Huas-Suarez, Corinne Huber, Patrick Imbert, Pascal Jacques, Cécile Jacquet, Jean-Pierre Jacquet, Denis Jacquiot, Philippe Jacquot, Samy Jaffre, Clémence Jean, Pauline Jeanmougin, Isabelle Jeudy, Jean-Philippe Joseph, Pierre Jouannic, Stéphanie Jousson, André Kastelik, Gérard Klifa, François-René Knockaert, Jean-Philippe Koch, Julia Krotoff, Charlotte Labrune, Véronique Lacaille-Smerilli, François Lacoïn, Xavier Lainé, Philippe Lambert, Audrey Lambourg, Dominique Lamy, Myriam Lapenne-Creusot, Jean-Dominique Laporte, Lucie Lartaud, Nadège Lauchet, Dorothée Lavielle, Julien Le Breton, Raphaël Le Diagon, Marie Le Du, Delphine Le Goff, Claire Le Lann, Stéphane Le Mouël, Carole Leblan-Depelsenaire, Frédéric Leclercq, Rudolphe Lécutier, Jean-Nicolas Ledoux, Jean-Marc Lefebvre, Pascal Léger, Robert Lendais, Eric Lengagne, Catherine Sosiewicz-Lengsavath, Sylvie Lenoir, Patrick Lerouge, Benoît Leroy, Ida Leung-Y-Tai, Pascal Ligier, Charlotte Lobel, François Loez, Béatrice Lognos, Baptiste Luaces, Laurence Lucas-Couturier, Anne Lunven, Sigolène Machraoui, André Maciejewski, Loïc Magnen, Georgios Makridis, Jean-Luc Malbrunot, Jean-Marc Mancini, Hervé Mangin, Jean-Marc Maniglier, Philippe Marchant, Julie Marcus, Guillaume Marien, Anne-Laure Martin-Etzol, Christian Mas, Yannick Masset, Pierre Massin, Bruno Masson, Agnès Mattera, Charlotte Matz, François Maufoy, Collette Maury, Laure-Emmanuelle Mavraganis, Olivier Mazin, Lison Mazué, Jean-Philippe Melizan, Dominique Menard, Alain Mercier, Patricia Mercier, Patric-Alain Meyer, Philippe Michellier, Corinne Milleret, Yannick Millot, Françoise Minard, Marie-Léa Miqueu, Dany Mismacque, Catherine Mitifiot, Jean-Louis Moebs, Jean-Michel Monnier, Yves Montariol, Jérémie Montauze, Alain Morand,

Gilles Morel, François Morlon, Delphine Mortas, Baptiste Motte, Stéphane Mouget, Luc Munro, Martin Naessens, Bounthanousone Nammathao, Dominique Negre, Charlie Nogrel, Lucile Nouvellet, Ismaël Nureni Banafunzi, Thierry Oger, Jean-François Ortholan, Dominique Osty, Agnès Oude Engberink, Guy-Marc Paillard, Laurent Paillard, Marie-Paule Pautout-Guillaume, Laurent Pech-Gourg, Corinne Perdrix, Véronique Perez, Ségolène Perrillat-Amédé, Christophe Peyrou, Bruno Pichat, Christophe Pigache, Alexis Pinot, Dominique Piquard, Thierry Piquet, Michel Placet, Michel Plauchier, Caroline Pluskota, Maurice Ponchant, Chantal Prat, Martine Prevost, Jean-Pierre Prigent, Thibaut Py, Christian Rafin, Jacques Rambaud, Jean-Paul Rapoud, Anne-Marie Regnier, Sylvain Renaudin, Jean-Michel Rétaux, Amélie Richard, Philippe Richetta, Jean-Michel Rigault, Reinold Rigoli, Anne Ritter-Meinicke , Sarah Robert, Stéphanie Rollin, Didier Rondepierre, Sophie Rosenberg, Mélanie Roth, Fabien Rougerie, Guillaume Royer De Vericourt, Karen Rudelle, Philippe Ruelle, Marcel Ruetsch, Dominique Saillard, Pénélope Saint-Denis, Pietro Sannelli, Philippe Saraidarian, Jean-Pascal Sastourné, Laurent Sauvage, Christian Scellier, Christian Schaal, François-Xavier Schelcher, Daniel Schirlin, Anne Schirrer, Claude Schlienger, Joëlle Schlienger, Philippe Serayet, Denis Serramoune, Marlène Siebler, Jean-Paul Simon, André Soares, Carine Soussotte-Ducasse, Philippe Stefanuto, Marc Steinberger, Marianne Szapiro, Anas Taha, Erol Taluy, Gilles Tanguy, Dominique Tardieux, Michel Tardy, Benoît Tavernier, Jean-Luc Ténédos, Lorène Thelot-Bach, Rémy Tisserand, Audrey Tordoir, François Trillot, Pascal Triouleyre, David Truong, Laurent Turi, Frédéric Vaillant, Hélène Vaillant-Roussel, Pierre Vailler, Josette Vallee, Muriel Vampouille, Jean-Louis Vangi, Fabien Vannier, Simon Varin, Florence Vaugeois, Jean-Charles Vauthier, Virginie Vauthier, Delphine Veillard, Anne-Laure Verjus, Paul-Bernard Verjus, Gilles Verney, Eloïse Vialtel, Fernand Vierling, Graziella Virgone-Rebaud, Marc Vital-Durand, Eric Vittori, Nadège Volcler, Philippe

Vorilhon, Pierre Watteau, Christine Weisbecker, Nathalie Wey, Françoise Wilhelm-Nenot,  
Jean-Louis Wurtz, Patricia Yvon, Claire Zabawa, Jean-Marc Zamboni, Anne-Claire Zipper
